# Supplementary material
Source: PubMed Central journal article supplement (PMC9630661)

## SUPPLEMENTARY MATERIAL

**Supplementary Table 1: ddPCR probe specifications.** Commercially available probes were purchased from Biorad and used following manufacturer's instructions for amplification cycles, with annealing temperatures as shown (in °C)

| <b>Probeset description</b>                   | <b>Assay ID</b>  | <b>Annealing temperature</b> |
|-----------------------------------------------|------------------|------------------------------|
| ddPCR™ Mutation Assay: AKT3 p.E17K, Human     | dHsaMDS121759946 | 55                           |
| ddPCR™ Mutation Assay: PIK3CA p.E542K, Human  | dHsaMDV2010073   | 57                           |
| ddPCR™ Mutation Assay: PIK3CA p.E545K, Human  | dHsaMDV2010075   | 57                           |
| ddPCR™ Mutation Assay: PIK3CA p.H1047R, Human | dHsaMDV2010077   | 55                           |
| ddPCR™ Mutation Assay: MTOR p.S2215F, Human   | dHsaMDS365202467 | 55                           |
| ddPCR™ Mutation Assay: MTOR p.S2215Y, Human   | dHsaMDS2514998   | 55                           |

**Supplementary Table 2: Complete list of samples and ddPCR results for the 17 mutation positive patients and comparison with orthogonal methods.** Patients' de-identified code (Patient-ID), sex, diagnosis based on neuroimaging (Dx-MRI), Diagnosis based on neuropathology (Dx-NPath), genetic variant, sample type and results from the different variant identification methods (ddPCR, Oncoplex, smMIPs, Exome sequencing, and Amplicon sequencing) are listed for each of the 17 mutation-positive patients. For ddPCR results, Variant allele fraction (VAF%), Delta confidence interval (DCI), and number of wild-type and mutant droplets (average of quadruplicate) are reported. Samples were considered positive for a given mutation via ddPCR when  $DCI > 0.045$  and  $VAF > 0.05\%$  (green text). Negative samples are indicated in red text. False positive results are indicated in green bolded text and \*, while false negative results are indicated in red italic text and \*\*. Empty cells represent lack of testing due to exhaustion of sample.

| Patient ID | Sex | Dx - MRI | Dx - NPATH | Genetic variant   | Sample type                          | ddPCR              |       |        | Oncoplex           |        | smMIPs             |        | Exomes             |            | Amplicon Seq       |       |
|------------|-----|----------|------------|-------------------|--------------------------------------|--------------------|-------|--------|--------------------|--------|--------------------|--------|--------------------|------------|--------------------|-------|
|            |     |          |            |                   |                                      | Mutant/total reads | VAF%  | DCI    | Mutant/total reads | VAF %  | Mutant/total reads | VAF %  | Mutant/total reads | VAF %      | Mutant/total reads | VAF % |
| LR16-470   | M   | HMEG     | NA         | PIK3CA (p.E542K)  | Saliva                               | 704568             | 1.47  | 1.056  | 7836               | 0.837  |                    |        |                    |            |                    |       |
| LR13-197   | F   | DMEG     | FCD 1b     | PIK3CA (p.E545K)  | Blood                                | 49280              | 0.04  | -0.077 |                    |        |                    |        |                    |            |                    |       |
|            |     |          |            |                   | Saliva                               | 7923776            | 20.68 | 19.398 |                    |        |                    |        |                    |            |                    |       |
|            |     |          |            |                   | Brain, FFPE                          | 2461297            | 18.86 | 16.691 | 23185              | 12.432 |                    |        |                    |            |                    |       |
| LR15-251   | M   | HMEG     | NA         | PIK3CA (p.E545K)  | Blood                                | 231069             | 0.02  | -0.049 | 1/1241             | 0.081  | 0/205              | 0.00   |                    |            |                    |       |
|            |     |          |            |                   | Buccal                               | 86473              | 0.12  | -0.015 |                    |        | 0/164              | 0.00   |                    |            |                    |       |
| LR16-242   | F   | HMEG     | NA         | PIK3CA (p.E545K)  | Brain                                | 17577865           | 21.76 | 20.780 | 1691015            | 16.650 | 47165              | 28.485 |                    |            |                    |       |
|            |     |          |            |                   | Brain                                | 18278430           | 21.01 | 19.996 |                    |        | 95522              | 18.179 |                    |            |                    |       |
| LR16-413   | M   | HMEG     | FCD        | PIK3CA (p.E545K)  | Peripheral blood                     |                    |       |        |                    |        | 0636               | 0.000  |                    |            |                    |       |
|            |     |          |            |                   | Skin fibroblasts                     |                    |       |        |                    |        | 0582               | 0.000  |                    |            |                    |       |
|            |     |          |            |                   | Saliva                               | 13775937           | 22.67 | 21.459 | 2271086            | 20.902 |                    |        |                    |            |                    |       |
|            |     |          |            |                   | Brain, anterior dysplasia            | 39796              | 0.03  | -0.072 |                    |        |                    |        |                    |            |                    |       |
|            |     |          |            |                   | Brain, superior temporal             | 1014226            | 0.06  | -0.050 |                    |        |                    |        |                    |            |                    |       |
|            |     |          |            |                   | Brain, temporal tip                  | 1711562            | 0.13  | 0.000  |                    |        |                    |        |                    |            |                    |       |
|            |     |          |            |                   | Brain, inferior temporal             | 4414122            | 0.28  | 0.120  | 0/004**            | 0      |                    |        |                    |            |                    |       |
|            |     |          |            |                   | Brain, anterior inferior             | 2112662            | 0.15  | 0.010  |                    |        |                    |        |                    |            |                    |       |
|            |     |          |            |                   | Brain, middle temporal               | 109044             | 0.10  | -0.040 |                    |        |                    |        |                    |            |                    |       |
|            |     |          |            |                   | Brain, amygdala                      | 2115168            | 0.12  | 0.000  |                    |        |                    |        |                    |            |                    |       |
|            |     |          |            |                   | Brain, hippocampus                   | 76259              | 0.11  | -0.050 |                    |        |                    |        |                    |            |                    |       |
|            |     |          |            |                   | Brain, cusa                          | 24268              | 0.05  | -0.072 |                    |        |                    |        |                    |            |                    |       |
|            |     |          |            |                   | Brain, FFPE, superior temporal       | 39620              | 0.03  | -0.26  |                    |        |                    |        |                    |            |                    |       |
|            |     |          |            |                   | Brain, FFPE, inferior temporal 1     | 45482              | 0.07  | 0.00   |                    |        |                    |        |                    |            |                    |       |
|            |     |          |            |                   | Brain, FFPE, inferior temporal 2     | 96090              | 0.14  | 0.05   |                    |        |                    |        |                    |            |                    |       |
|            |     |          |            |                   | Brain, FFPE, inferior temporal 3     | 38068              | 0.03  | 0      |                    |        |                    |        |                    |            |                    |       |
| LR12-251   | F   | FCD      | FCD 2a     | PIK3CA (p.H1047R) | Saliva                               | 06774              | 0.00  | -0.06  | 0/650              | 0      |                    |        |                    |            |                    |       |
|            |     |          |            |                   | Brain                                | 57411451           | 4.58  | 4.186  |                    |        |                    |        |                    |            |                    |       |
|            |     |          |            |                   | Brain, frontal lobe                  | 7215114            | 13.76 | 12.771 |                    |        | 1041063            | 9.784  |                    |            |                    |       |
|            |     |          |            |                   | Brain, operculum                     | 10677604           | 13.51 | 12.703 |                    |        | 92932              | 9.871  |                    |            |                    |       |
|            |     |          |            |                   | Brain, superior temporal             | 14047549           | 17.93 | 16.987 |                    |        | 2111172            | 18.003 |                    |            |                    |       |
|            |     |          |            |                   | Brain, anterior temporal 1           | 169711371          | 14.06 | 13.352 |                    |        | 1921168            | 7.877  |                    |            |                    |       |
|            |     |          |            |                   | Brain, anterior temporal 2           | 10626515           | 15.78 | 14.820 |                    |        |                    |        |                    |            |                    |       |
|            |     |          |            |                   | Brain, dura                          | 888502             | 0.95  | 0.668  |                    |        |                    |        |                    |            |                    |       |
|            |     |          |            |                   | Brain, parietal                      | 5877862            | 7.08  | 6.437  |                    |        |                    |        |                    |            |                    |       |
|            |     |          |            |                   | Brain, other                         | 8396792            | 11.80 | 10.963 |                    |        |                    |        |                    |            |                    |       |
|            |     |          |            |                   | Brain, hippocampus                   | 10396864           | 14.54 | 13.64  |                    |        | 1641090            | 15.046 |                    |            |                    |       |
|            |     |          |            |                   | Epidermis                            | 8411348            | 0.67  | 0.44   | 10789              | 1.267  |                    |        |                    |            |                    |       |
|            |     |          |            |                   | Cultured fibroblasts                 | 47448              | 0.05  | -0.09  |                    |        |                    |        |                    |            |                    |       |
| LR12-317   | M   | HMEG     | NA         | AKT3 (p.E17K)     | Brain, FFPE                          | 99762              | 12.93 | 10.461 |                    |        |                    |        |                    |            |                    |       |
|            |     |          |            |                   | Saliva                               | 142347             | 0.58  | 0.208  | 3/1143             | 0.262  |                    |        |                    |            |                    |       |
| LR13-351   | F   | FCD      | FCD 2a     | AKT3 (p.E17K)     | Brain                                | 537955             | 0.62  | 0.428  |                    |        |                    |        |                    |            |                    |       |
|            |     |          |            |                   | Blood                                | 38093              | 0.03  | -0.023 |                    |        |                    |        |                    |            |                    |       |
|            |     |          |            |                   | Brain, temporal lobe                 | 573263             | 1.66  | 1.231  |                    |        |                    |        |                    |            |                    |       |
|            |     |          |            |                   | Brain, hippocampus                   | 1611254            | 1.26  | 0.639  |                    |        |                    |        |                    |            |                    |       |
|            |     |          |            |                   | Brain, insula-1                      | 2453262            | 7.26  | 6.384  |                    |        |                    |        |                    |            |                    |       |
|            |     |          |            |                   | Brain, insula-2                      | 4537056            | 5.93  | 5.395  |                    |        |                    |        |                    |            |                    |       |
|            |     |          |            |                   | Brain, temporal tip                  | 803618             | 2.13  | 1.670  |                    |        |                    |        |                    |            |                    |       |
|            |     |          |            |                   | Brain, FFPE-1                        | 1342048            | 6.44  | 5.315  |                    |        |                    |        |                    |            |                    |       |
|            |     |          |            |                   | Brain, FFPE-2                        | 1892621            | 7.08  | 6.033  |                    |        |                    |        |                    |            |                    |       |
|            |     |          |            |                   | Brain, FFPE-3                        | 1692018            | 8.25  | 6.990  | 38/497             | 7.646  |                    |        |                    |            |                    |       |
|            |     |          |            |                   | Brain, FFPE-4                        | 391576             | 2.44  | 1.608  |                    |        |                    |        |                    |            |                    |       |
|            |     |          |            |                   | Skin                                 | 03688              | 0.00  | 0.000  |                    |        |                    |        |                    |            |                    |       |
| LR12-246   | M   | HMEG     | FCD 2a     | MTOR (p.S2215F)   | Brain                                | 1910964            | 0.16  | 0.047  | 5/2879             | 0.002  | 0/48               | 0.000  |                    |            |                    |       |
|            |     |          |            |                   | Brain, lateral frontal lobe          | 210948             | 0.02  | -0.051 |                    |        | 0/7                | 0.000  |                    |            |                    |       |
|            |     |          |            |                   | Brain, medial frontal lobe           | 6/12085            | 0.04  | -0.043 |                    |        |                    |        |                    |            |                    |       |
|            |     |          |            |                   | Brain, orbital frontal lobe          | 7511983            | 0.57  | 0.388  | 11/1640**          | 0.0067 | 0/15**             | 0.000  |                    |            |                    |       |
|            |     |          |            |                   | Brain, FFPE, frontal lobe            | 8/1292             | 0.06  | -0.034 |                    |        |                    |        |                    |            |                    |       |
|            |     |          |            |                   | Brain, FFPE, parietal lobe           | 5/10161            | 0.05  | -0.047 |                    |        |                    |        |                    |            |                    |       |
|            |     |          |            |                   | Brain, FFPE, posterior temporal lobe | 3011250            | 0.24  | 0.104  |                    |        |                    |        |                    |            |                    |       |
|            |     |          |            |                   | Brain, FFPE, occipital lobe          | 4/11120            | 0.03  | -0.051 |                    |        |                    |        |                    |            |                    |       |
|            |     |          |            |                   | Brain, FFPE, white matter            | 68714              | 0.06  | -0.040 |                    |        |                    |        |                    |            |                    |       |
|            |     |          |            |                   | Brain, FFPE, superior frontal lobe   | 9/10528            | 0.08  | -0.025 |                    |        |                    |        |                    |            |                    |       |
|            |     |          |            |                   | Brain, superior temporal             | 557789             | 0.65  | 0.390  |                    |        | 0/351*             | 0.000  | 0/435*             | 0          |                    |       |
|            |     |          |            |                   | Brain, inferior temporal             | 2130292            | 0.05  | -0.030 |                    |        | 0/178              | 0.000  | 0/2798             | 0          |                    |       |
|            |     |          |            |                   | Brain, middle temporal               | 1830290            | 0.04  | -0.030 |                    |        | 0/266              | 0.000  | 0/2416             | 0          |                    |       |
|            |     |          |            |                   | Brain, basal temporal                | 6/15644            | 0.03  | -0.050 |                    |        | 0/238              | 0.000  | 0/2941             | 0          |                    |       |
|            |     |          |            |                   | Brain, amygdala                      | 29287              | 0.02  | -0.047 |                    |        | 0/302              | 0.000  | 0/2941             | 0          |                    |       |
|            |     |          |            |                   | Brain, hippocampus                   | 48328              | 0.04  | -0.047 |                    |        | 0/202              | 0.000  | 0/2941             | 0          |                    |       |
|            |     |          |            |                   | Brain, parietal lobe                 | 2439276            | 2.44  | 2.090  |                    |        | 3/346*             | 1.220  | 9/7583*            | 0.11886654 |                    |       |
|            |     |          |            |                   | Brain, posterior temporal-1          | 120016993          | 6.22  | 5.824  |                    |        | 0/281**            | 0.000  | 0/569**            | 0          |                    |       |
|            |     |          |            |                   | Brain, posterior temporal-2          | 29410678           | 2.54  | 2.202  |                    |        | 15/158             | 9.494  | 761828             | 4.15754923 |                    |       |
|            |     |          |            |                   | Brain, frontal operculum             | 169395             | 0.16  | 0.032  |                    |        | 7/220              | 3.182  | 474016             | 1.17031873 |                    |       |
|            |     |          |            |                   | Brain, mid-frontal                   | 48203              | 0.05  | -0.047 |                    |        | 6/204              | 2.941  | 542361             | 2.28716645 |                    |       |
|            |     |          |            |                   | Brain, posterior frontal             | 4219411            | 4.16  | 3.727  |                    |        |                    |        |                    |            |                    |       |
|            |     |          |            |                   | Brain, posterior temporal            | 1438092            | 1.66  | 1.346  |                    |        |                    |        |                    |            |                    |       |
|            |     |          |            |                   | Brain, inferior frontal              | 98096              | 0.10  | -0.012 |                    |        |                    |        |                    |            |                    |       |
|            |     |          |            |                   | Brain, orbital frontal               | 97531              | 0.11  | -0.010 |                    |        |                    |        |                    |            |                    |       |
|            |     |          |            |                   | Saliva                               | 2/167              | 0.03  | -0.047 |                    |        |                    |        |                    |            |                    |       |
| LR14-046   | M   | FCD      | FCD        | MTOR (p.S2215F)   | Brain, deep temporal                 | 3237638            | 3.91  | 3.379  | 75/2513            | 0.030  |                    |        |                    |            |                    |       |
|            |     |          |            |                   | Brain, posterior frontal             | 3810187            | 0.34  | 0.121  | 6/1419             | 0.423  |                    |        |                    |            |                    |       |
| LR14-155   | F   | FCD      | FCD 2b     | MTOR (p.S2215F)   | Brain, anterior frontal              | 8/11312            | 0.06  | -0.091 | 0/1417             | 0.000  |                    |        |                    |            |                    |       |
|            |     |          |            |                   | Saliva                               |                    |       |        |                    |        |                    | 0/91   | 0.00               |            |                    |       |
|            |     |          |            |                   | Brain, lateral temporal lobe         | 6017966            | 7.18  | 6.626  |                    |        | 2/21               | 9.524  |                    |            |                    |       |
|            |     |          |            |                   | Brain, inferior temporal lobe        | 897954             | 1.05  | 0.836  |                    |        | 1/69               | 1.449  |                    |            |                    |       |
|            |     |          |            |                   | Brain, temporal tip                  | 2485042            | 4.72  | 4.143  |                    |        | 3/23               | 13.043 |                    |            |                    |       |
|            |     |          |            |                   | Brain, hippocampus                   | 26077              | 0.03  | 0.000  |                    |        | 0/5                | 0.000  |                    |            |                    |       |
|            |     |          |            |                   | Brain, anterior frontal lobe         | 16009              | 0.02  | 0.000  |                    |        | 0/102              | 0.000  |                    |            |                    |       |
|            |     |          |            |                   | Brain, middle frontal lobe           | 8776238            | 13.59 | 12.756 |                    |        | 0/0                | 0.000  |                    |            |                    |       |
|            |     |          |            |                   | Brain, parietal lobe                 | 7907623            | 9.88  | 9.224  |                    |        | 5/75               | 6.667  |                    |            |                    |       |
|            |     |          |            |                   | Brain, insula and operculum          | 7988803            | 8.54  | 7.973  |                    |        | 8/58               | 13.793 | 16/111             | 14.41      |                    |       |
|            |     |          |            |                   | Brain, ventricle wall                | 1478551            | 1.60  | 1.341  |                    |        | 3/53               | 5.660  |                    |            |                    |       |
|            |     |          |            |                   | Brain, frontal basal cortex          | 2336872            | 3.20  | 2.798  |                    |        | 4/29               | 13.793 |                    |            |                    |       |
|            |     |          |            |                   | Brain, gyrus rectus                  | 08727              | 0.00  | 0.000  |                    |        |                    |        |                    |            |                    |       |
|            |     |          |            |                   | Saliva                               | 928998             | 0.96  | 0.761  |                    |        |                    |        | 2/78               | 2.56       |                    |       |

**Supplementary Table 3: Summary of clinical and neuroimaging features for the 17 mutation positive patients.** Abbreviations: d, day; DMEG, dysplastic megalencephaly; FCD focal cortical dysplasia; HMEG, hemimegalencephaly; y, year; m, month; PQD, posterior quadrant dysplasia; N/A, not available. Data from two patients have been previously published, namely: LR13-389 (PMID 27159400); LR11-443 (PMID 28969385, 25722288, 27159400).

| Mutation           | Patient ID | Sex | Ethnicity                           | Age last assessed | Diagnosis                    | Head size (cm) at birth         | Head size (cm) at last assessed | Seizure - age at onset | Seizure - type                                                                                                                  | Seizure - medical Rx                                   | Brain MRI - ages | Brain MRI - findings                                                                                                                                          | Epilepsy surgery - type                                                                                                                                                                 | Neuropathology                                                                                                                                                                   | Post surgery - epilepsy recurrence                                         | Somatic findings (vascular malformations, overgrowth)                       |
|--------------------|------------|-----|-------------------------------------|-------------------|------------------------------|---------------------------------|---------------------------------|------------------------|---------------------------------------------------------------------------------------------------------------------------------|--------------------------------------------------------|------------------|---------------------------------------------------------------------------------------------------------------------------------------------------------------|-----------------------------------------------------------------------------------------------------------------------------------------------------------------------------------------|----------------------------------------------------------------------------------------------------------------------------------------------------------------------------------|----------------------------------------------------------------------------|-----------------------------------------------------------------------------|
| P/KC/A<br>P/E52/K  | LR16-470   | M   | N/A                                 | N/A               | HMEG                         | N/A                             | N/A                             | N/A                    | Focal epileptic spasms                                                                                                          | N/A                                                    | N/A              | N/A                                                                                                                                                           | N/A                                                                                                                                                                                     | N/A                                                                                                                                                                              | N/A                                                                        | Abnormal swelling skin pigmentation on several areas of the body            |
|                    | LR13-197   | F   | N/A                                 | -2.5y             | DMEG                         | N/A                             | 38cm                            | -29d                   | Starting episodes, back arching, focal                                                                                          | Medically intractable                                  | 37d              | HMEG                                                                                                                                                          | N/A                                                                                                                                                                                     | N/A                                                                                                                                                                              | N/A                                                                        | Right lower extremity hemihypertrophy with some left-sided facial asymmetry |
|                    | LR15-251   | M   | Caucasian                           | 16y               | HMEG                         | N/A                             | N/A (WNL by report)             | 1d                     | Status epilepticus: tonic-clonic with breath arrest                                                                             | Currently well-controlled, last seizure 4 years ago    | 3y               | HMEG                                                                                                                                                          | Temporo-parietal-occipital functional disconnection (2005), inferotemporal (May 2008), temporo-parietal-occipital functional disconnection more anterior than 1st procedure (Sept 2009) | N/A                                                                                                                                                                              | N/A                                                                        | Fat foot, trunkless skin, sebaceous nevus on left cheek                     |
|                    | LR16-242   | F   | Caucasian                           | 3 y               | HMEG                         | 37.2 cm                         | 51 cm at 3y7m, 95% for age      | 1 d                    | Flexor spasms, complex partial seizures                                                                                         | Medically intractable, much improved on ketogenic diet | 2d               | R HMEG, with L hemispherectomy                                                                                                                                | No                                                                                                                                                                                      | N/A                                                                                                                                                                              | N/A (died at age 4y 1m from respiratory arrest after status epilepticus)   | Enlarged R cheek and eye, swelled brown nodule on R cheek extending to neck |
| P/KC/A<br>P/H1047R | LR16-413   | M   | Caucasian                           | N/A               | HMEG                         | 46cm                            | N/A                             | 2d                     | Abnormal eye movements, TC, EEG low Ohabara syndrome                                                                            | Medically intractable                                  | N/A              | L HMEG and R parieto-occipital FCD (likely FCD type 2)                                                                                                        | N/A                                                                                                                                                                                     | N/A                                                                                                                                                                              | N/A                                                                        | Hypertrophic left lip/cheek                                                 |
|                    | LR16-024   | F   | N/A                                 | 17y               | FCD                          | N/A                             | N/A                             | 6y                     | Abnormal eye movements, complex partial                                                                                         | Medically intractable                                  | 5y, 15y, 17y     | Non-specific small focal areas of T2/FLAIR prolongation in the L superior frontal periventricular white matter, hypomyelination in R anterior temporal region | Misrodinectomy                                                                                                                                                                          | No post-surgical recurrence                                                                                                                                                      | -                                                                          | -                                                                           |
|                    | LR12-251   | F   | Asian/Hawaiian/<br>Pacific Islander | 12y               | FCD                          | N/A, referred after 1st seizure | 50cm                            | 3y                     | Absent, partial seizures                                                                                                        | Medically intractable                                  | 5y               | FCD with mass effect                                                                                                                                          | R temporo-parietal craniotomy, R occipital lobectomy                                                                                                                                    | FCD2a                                                                                                                                                                            | No post-surgical recurrence                                                | -                                                                           |
|                    | LR11-443   | F   | Caucasian                           | 8y                | HMEG (+<br>comititant focus) | 36cm                            | 48-4cm                          | 3d                     | Generalized, focal                                                                                                              | Medically intractable, ketogenic diet                  | 4y               | HMEG with involvement of comititant mesial occipital lobe                                                                                                     | Craniotomy hemispherectomy total, craniotomy                                                                                                                                            | FCD2a                                                                                                                                                                            | Post-surgical recurrence 2 for days postop #1, and after 4-6m postop#2     | Cuts mammae, epigomomygaly, 1: retroorbital vascular malformation           |
| P/KC/A<br>P/E17K   | LR12-317   | M   | Caucasian                           | 14m               | HMEG                         | N/A                             | 44.3                            | 7d                     | [stiffness, flexion of trunk, rhythmic lip smacking/chewing, rigid extremities which moved from flexion into extension 3 times] | Medically intractable                                  | 13d              | HMEG                                                                                                                                                          | Hemispherectomy                                                                                                                                                                         | [Sections show disorganized cortical layering; neurons disorganized with focal clustering and vary immensely in size, likely representing a form of HMEG/MGAP, Ohabara syndrome] | No post-surgical recurrence                                                | Caucasian vascular lesions on extremities and trunk                         |
|                    | LR13-351   | F   | N/A                                 | N/A               | FCD                          | N/A                             | N/A                             | N/A                    | CPS                                                                                                                             | N/A                                                    | N/A              | Right occipital lobectomy                                                                                                                                     | FCD2a                                                                                                                                                                                   | Best seizure                                                                                                                                                                     | -                                                                          |                                                                             |
|                    | LR16-313   | F   | Caucasian                           | 3y                | FCD                          | 36.8 (1m)                       | 45.9 (2y)                       | -4d                    | ISS                                                                                                                             | Medically intractable                                  | 1m               | HMEG                                                                                                                                                          | Right craniotomy hemispherectomy                                                                                                                                                        | FCD2a                                                                                                                                                                            | No post-surgical recurrence                                                | -                                                                           |
|                    | LR12-246   | M   | Caucasian                           | 13y               | HMEG (POD)                   | 38.5cm at 1m                    | 43.8cm                          | 3d                     | Multiple types                                                                                                                  | Medically intractable                                  | 6m               | FCD                                                                                                                                                           | Hemispherectomy (S2)                                                                                                                                                                    | FCD2a                                                                                                                                                                            | No post-surgical recurrence                                                | -                                                                           |
|                    | LR13-129   | M   | Caucasian                           | 5y                | FCD                          | N/A                             | 49cm                            | 11m                    | drop attacks, gaze seizures, intractable                                                                                        | Medically intractable                                  | 5y               | FCD                                                                                                                                                           | Craniotomy NSR (3), craniotomy hemispherectomy                                                                                                                                          | FCD2b (x3, not seen in last resection)                                                                                                                                           | Possible 1 seizure recurrence                                              | -                                                                           |
|                    | LR13-389   | F   | Caucasian                           | 6y                | FCD                          | 37.1cm at 6w                    | 48.2cm at 3y                    | 5w                     | CPS                                                                                                                             | Medically intractable                                  | 7m               | HMEG                                                                                                                                                          | Craniotomy NSR (2/2/13), craniotomy hemispherectomy (2/2/14)                                                                                                                            | FCD2a                                                                                                                                                                            | Only one seizure of a different semiology post 2nd procedure               | -                                                                           |
| P/KC/A<br>P/S2215F | LR16-046   | M   | Caucasian                           | 6y                | FCD                          | N/A                             | 53.4cm                          | 7m                     | Starting spells with occasional left upper extremity twitching, tonic posturing                                                 | Medically intractable                                  | 5y               | FCD                                                                                                                                                           | Craniotomy placement distal, craniotomy removal grid w/ resection                                                                                                                       | FCD2b                                                                                                                                                                            | No post-surgical recurrence                                                | -                                                                           |
|                    | LR14-155   | F   | Caucasian                           | 17y               | FCD                          | N/A                             | 53.5cm (12y)                    | 5y                     | Localization-related (focal) epilepsy, CPS                                                                                      | Medically intractable                                  | 12y, 15y         | FCD                                                                                                                                                           | Craniotomy NSR                                                                                                                                                                          | FCD2b                                                                                                                                                                            | No post-surgical recurrence                                                | -                                                                           |
| P/KC/A<br>P/S2215Y | LR16-004   | M   | Caucasian                           | 3y                | HMEG                         | N/A                             | 45.9 (3y)                       | 3w                     | ISS                                                                                                                             | Medically intractable                                  | 6m               | HMEG                                                                                                                                                          | Craniotomy, left hemispherectomy total (1/7/16)                                                                                                                                         | FCD2a                                                                                                                                                                            | Movements continued to be jerky after first craniotomy/epilepsy recurrence | -                                                                           |

**Supplementary Table 4: Data summary of patients and samples who tested negative for the 6 PI3K-AKT-MTOR hotspot mutations.** Patients' de-identified code (Patient-ID), diagnosis based on neuroimaging (Dx-MRI), Diagnosis based on neuropathology (Dx-NPath), and sample type are listed for the mutation-negative patients (n=41). All samples were tested via ddPCR for all 6 hotspots in quadruplicates and in multiple independent runs. All samples had a DCI<0.045, thus they were considered negative (cells shaded in red). The average of each quadruplicate is reported here. Number of WT droplets is reported as measure of quality of the ddPCR run; samples with over 3000 were considered robust and subsequently analyzed (green shaded cells). If samples had less than 3000 WT droplets (yellow shaded cells) and VAF<0.1%, they were deemed negative. When multiple runs were performed for a given sample, results from the run yielding the highest number of wild-type droplets (WT droplets) is reported here. Patient LR12-245 was previously published in PMID: 27159400.

| Di (neuropathology) | Patient ID | Sex    | DS (Neuropathology) | Stimulus - age of onset (mo) | # of surgeries | Sample type             | FPGC/P-R54SK |       |          | FPGC/P-R418R |       |          | MTOF p-R221F8 |      |          | MTOF p-R221F9 |       |          | AFTJ p-R17K |      |          |         |        |          |       |   |
|---------------------|------------|--------|---------------------|------------------------------|----------------|-------------------------|--------------|-------|----------|--------------|-------|----------|---------------|------|----------|---------------|-------|----------|-------------|------|----------|---------|--------|----------|-------|---|
|                     |            |        |                     |                              |                |                         | V.A.P.%      | DCI   | WT Drops | V.A.P.%      | DCI   | WT Drops | V.A.P.%       | DCI  | WT Drops | V.A.P.%       | DCI   | WT Drops | V.A.P.%     | DCI  | WT Drops | V.A.P.% | DCI    | WT Drops |       |   |
| ECD                 | LR12-244   | F      | FCD 1b              | 7:00                         | 2              | Brain - Saliva          | 0.03         | -0.01 | 3469     | 1            | 0.04  | 0.00     | 2310          | 1    | 0.01     | 0.00          | 3562  | 0        | 0.00        | 0.00 | 3379     | 0       | 0.00   | 0.00     | 3573  | 2 |
|                     | LR12-245   | F      | FCD 2a              | 6:00                         | 3              | Brain - medial parietal | 0.02         | -0.04 | 8014     | 4            | 0.03  | -0.02    | 9286          | 3    | 0.01     | 0.00          | 6763  | 1        | 0.03        | 0.00 | 6784     | 3       | 0.02   | -0.026   | 10784 | 2 |
|                     | LR12-246   | F      | FCD 2b              | 4:00                         | 3              | Brain                   | 0.02         | -0.00 | 4435     | 2            | 0.03  | -0.02    | 5933          | 1    | 0.02     | 0.00          | 5933  | 0        | 0.02        | 0.00 | 5526     | 0       | 0.02   | -0.021   | 7112  | 5 |
|                     | LR12-247   | F      | FCD 2b              | 4:00                         | 3              | Brain                   | 0.02         | -0.00 | 4435     | 2            | 0.03  | -0.02    | 5933          | 1    | 0.02     | 0.00          | 5933  | 0        | 0.02        | 0.00 | 5526     | 0       | 0.02   | -0.021   | 7112  | 5 |
|                     | LR12-248   | M      | FCD 2b              | 48:67                        | 3              | Brain                   | 0.03         | -0.00 | 10974    | 4            | 0.03  | -0.02    | 9819          | 3    | 0.02     | 0.00          | 8485  | 1        | 0.02        | 0.00 | 10213    | 2       | 0.02   | -0.026   | 12121 | 3 |
|                     | LR12-249   | M      | FCD 1a              | 12:17                        | 2              | Brain                   | 0.03         | -0.00 | 10609    | 4            | 0.02  | -0.02    | 10186         | 2    | 0.04     | -0.02         | 10186 | 0        | 0.00        | 0.00 | 10765    | 0       | 0.02   | -0.008   | 11776 | 8 |
|                     | LR12-250   | M      | FCD 1a              | 10:00                        | 2              | Brain                   | 0.02         | -0.00 | 10609    | 4            | 0.02  | -0.02    | 10186         | 2    | 0.04     | -0.02         | 10186 | 0        | 0.00        | 0.00 | 10765    | 0       | 0.02   | -0.008   | 11776 | 8 |
|                     | LR12-251   | F      | FCD 2b              | 10:00                        | 2              | Brain                   | 0.02         | -0.00 | 10609    | 4            | 0.02  | -0.02    | 10186         | 2    | 0.04     | -0.02         | 10186 | 0        | 0.00        | 0.00 | 10765    | 0       | 0.02   | -0.008   | 11776 | 8 |
|                     | LR12-252   | F      | FCD 2a              | 71:00                        | 2              | Saliva                  | 0.03         | -0.00 | 8211     | 3            | 0.04  | -0.02    | 9741          | 3    | 0.00     | 0.00          | 6591  | 1        | 0.01        | 0.00 | 7429     | 1       | 0.07   | -0.002   | 11102 | 9 |
|                     | LR12-253   | F      | FCD 2a              | 11:467                       | 2              | Brain                   | 0.02         | -0.00 | 11467    | 2            | 0.04  | -0.02    | 9124          | 2    | 0.01     | 0.00          | 8960  | 1        | 0.02        | 0.00 | 11832    | 2       | 0.02   | -0.079   | 9880  | 2 |
|                     | LR12-254   | F      | FCD 2b              | 13:57                        | 2              | Brain                   | 0.02         | -0.00 | 11467    | 2            | 0.04  | -0.02    | 9124          | 2    | 0.01     | 0.00          | 8960  | 1        | 0.02        | 0.00 | 11832    | 2       | 0.02   | -0.079   | 9880  | 2 |
|                     | LR12-255   | M      | FCD 2b              | 4:07                         | 2              | Brain                   | 0.02         | -0.00 | 11467    | 2            | 0.04  | -0.02    | 9124          | 2    | 0.01     | 0.00          | 8960  | 1        | 0.02        | 0.00 | 11832    | 2       | 0.02   | -0.079   | 9880  | 2 |
|                     | LR12-256   | F      | FCD 2b              | 18:50                        | 3              | Brain                   | 0.02         | -0.00 | 11467    | 2            | 0.04  | -0.02    | 9124          | 2    | 0.01     | 0.00          | 8960  | 1        | 0.02        | 0.00 | 11832    | 2       | 0.02   | -0.079   | 9880  | 2 |
|                     | LR12-257   | M      | FCD 1b              | N/A                          | 1              | Brain                   | 0.02         | -0.00 | 8211     | 3            | 0.04  | -0.02    | 9741          | 3    | 0.00     | 0.00          | 6591  | 1        | 0.01        | 0.00 | 7429     | 1       | 0.07   | -0.002   | 11102 | 9 |
|                     | LR12-258   | M      | FCD 1b              | N/A                          | 1              | Brain                   | 0.02         | -0.00 | 8211     | 3            | 0.04  | -0.02    | 9741          | 3    | 0.00     | 0.00          | 6591  | 1        | 0.01        | 0.00 | 7429     | 1       | 0.07   | -0.002   | 11102 | 9 |
|                     | LR12-259   | M      | FCD 1b              | N/A                          | 1              | Brain                   | 0.02         | -0.00 | 8211     | 3            | 0.04  | -0.02    | 9741          | 3    | 0.00     | 0.00          | 6591  | 1        | 0.01        | 0.00 | 7429     | 1       | 0.07   | -0.002   | 11102 | 9 |
|                     | LR12-260   | M      | FCD 1b              | N/A                          | 1              | Brain                   | 0.02         | -0.00 | 8211     | 3            | 0.04  | -0.02    | 9741          | 3    | 0.00     | 0.00          | 6591  | 1        | 0.01        | 0.00 | 7429     | 1       | 0.07   | -0.002   | 11102 | 9 |
|                     | LR12-261   | M      | FCD 2b              | 18:50                        | 3              | Brain                   | 0.02         | -0.00 | 11467    | 2            | 0.04  | -0.02    | 9124          | 2    | 0.01     | 0.00          | 8960  | 1        | 0.02        | 0.00 | 11832    | 2       | 0.02   | -0.079   | 9880  | 2 |
|                     | LR12-262   | F      | FCD 2b              | 18:50                        | 3              | Brain                   | 0.02         | -0.00 | 11467    | 2            | 0.04  | -0.02    | 9124          | 2    | 0.01     | 0.00          | 8960  | 1        | 0.02        | 0.00 | 11832    | 2       | 0.02   | -0.079   | 9880  | 2 |
|                     | LR12-263   | M      | FCD 1b              | N/A                          | 1              | Brain                   | 0.02         | -0.00 | 8211     | 3            | 0.04  | -0.02    | 9741          | 3    | 0.00     | 0.00          | 6591  | 1        | 0.01        | 0.00 | 7429     | 1       | 0.07   | -0.002   | 11102 | 9 |
| LR12-264            | M          | FCD 1b | N/A                 | 1                            | Brain          | 0.02                    | -0.00        | 8211  | 3        | 0.04         | -0.02 | 9741     | 3             | 0.00 | 0.00     | 6591          | 1     | 0.01     | 0.00        | 7429 | 1        | 0.07    | -0.002 | 11102    | 9     |   |
| LR12-265            | M          | FCD 1b | N/A                 | 1                            | Brain          | 0.02                    | -0.00        | 8211  | 3        | 0.04         | -0.02 | 9741     | 3             | 0.00 | 0.00     | 6591          | 1     | 0.01     | 0.00        | 7429 | 1        | 0.07    | -0.002 | 11102    | 9     |   |
| LR12-266            | F          | FCD 1b | N/A                 | 1                            | Brain          | 0.02                    | -0.00        | 8211  | 3        | 0.04         | -0.02 | 9741     | 3             | 0.00 | 0.00     | 6591          | 1     | 0.01     | 0.00        | 7429 | 1        | 0.07    | -0.002 | 11102    | 9     |   |
| LR12-267            | M          | FCD 1b | N/A                 | 1                            | Brain          | 0.02                    | -0.00        | 8211  | 3        | 0.04         | -0.02 | 9741     | 3             | 0.00 | 0.00     | 6591          | 1     | 0.01     | 0.00        | 7429 | 1        | 0.07    | -0.002 | 11102    | 9     |   |
| LR12-268            | M          | FCD 1b | N/A                 | 1                            | Brain          | 0.02                    | -0.00        | 8211  | 3        | 0.04         | -0.02 | 9741     | 3             | 0.00 | 0.00     | 6591          | 1     | 0.01     | 0.00        | 7429 | 1        | 0.07    | -0.002 | 11102    | 9     |   |
| LR12-269            | M          | FCD 1b | N/A                 | 1                            | Brain          | 0.02                    | -0.00        | 8211  | 3        | 0.04         | -0.02 | 9741     | 3             | 0.00 | 0.00     | 6591          | 1     | 0.01     | 0.00        | 7429 | 1        | 0.07    | -0.002 | 11102    | 9     |   |
| LR12-270            | M          | FCD 1b | N/A                 | 1                            | Brain          | 0.02                    | -0.00        | 8211  | 3        | 0.04         | -0.02 | 9741     | 3             | 0.00 | 0.00     | 6591          | 1     | 0.01     | 0.00        | 7429 | 1        | 0.07    | -0.002 | 11102    | 9     |   |
| LR12-271            | M          | FCD 1b | N/A                 | 1                            | Brain          | 0.02                    | -0.00        | 8211  | 3        | 0.04         | -0.02 | 9741     | 3             | 0.00 | 0.00     | 6591          | 1     | 0.01     | 0.00        | 7429 | 1        | 0.07    | -0.002 | 11102    | 9     |   |
| LR12-272            | M          | FCD 1b | N/A                 | 1                            | Brain          | 0.02                    | -0.00        | 8211  | 3        | 0.04         | -0.02 | 9741     | 3             | 0.00 | 0.00     | 6591          | 1     | 0.01     | 0.00        | 7429 | 1        | 0.07    | -0.002 | 11102    | 9     |   |
| LR12-273            | M          | FCD 1b | N/A                 | 1                            | Brain          | 0.02                    | -0.00        | 8211  | 3        | 0.04         | -0.02 | 9741     | 3             | 0.00 | 0.00     | 6591          | 1     | 0.01     | 0.00        | 7429 | 1        | 0.07    | -0.002 | 11102    | 9     |   |
| LR12-274            | M          | FCD 1b | N/A                 | 1                            | Brain          | 0.02                    | -0.00        | 8211  | 3        | 0.04         | -0.02 | 9741     | 3             | 0.00 | 0.00     | 6591          | 1     | 0.01     | 0.00        | 7429 | 1        | 0.07    | -0.002 | 11102    | 9     |   |
| LR12-275            | M          | FCD 1b | N/A                 | 1                            | Brain          | 0.02                    | -0.00        | 8211  | 3        | 0.04         | -0.02 | 9741     | 3             | 0.00 | 0.00     | 6591          | 1     | 0.01     | 0.00        | 7429 | 1        | 0.07    | -0.002 | 11102    | 9     |   |
| LR12-276            | M          | FCD 1b | N/A                 | 1                            | Brain          | 0.02                    | -0.00        | 8211  | 3        | 0.04         | -0.02 | 9741     | 3             | 0.00 | 0.00     | 6591          | 1     | 0.01     | 0.00        | 7429 | 1        | 0.07    | -0.002 | 11102    | 9     |   |
| LR12-277            | M          | FCD 1b | N/A                 | 1                            | Brain          | 0.02                    | -0.00        | 8211  | 3        | 0.04         | -0.02 | 9741     | 3             | 0.00 | 0.00     | 6591          | 1     | 0.01     | 0.00        | 7429 | 1        | 0.07    | -0.002 | 11102    | 9     |   |
| LR12-278            | M          | FCD 1b | N/A                 | 1                            | Brain          | 0.02                    | -0.00        | 8211  | 3        | 0.04         | -0.02 | 9741     | 3             | 0.00 | 0.00     | 6591          | 1     | 0.01     | 0.00        | 7429 | 1        | 0.07    | -0.002 | 11102    | 9     |   |
| LR12-279            | M          | FCD 1b | N/A                 | 1                            | Brain          | 0.02                    | -0.00        | 8211  | 3        | 0.04         | -0.02 | 9741     | 3             | 0.00 | 0.00     | 6591          | 1     | 0.01     | 0.00        | 7429 | 1        | 0.07    | -0.002 | 11102    | 9     |   |
| LR12-280            | M          | FCD 1b | N/A                 | 1                            | Brain          | 0.02                    | -0.00        | 8211  | 3        | 0.04         | -0.02 | 9741     | 3             | 0.00 | 0.00     | 6591          | 1     | 0.01     | 0.00        | 7429 | 1        | 0.07    | -0.002 | 11102    | 9     |   |
| LR12-281            | M          | FCD 1b | N/A                 | 1                            | Brain          | 0.02                    | -0.00        | 8211  | 3        | 0.04         | -0.02 | 9741     | 3             | 0.00 | 0.00     | 6591          | 1     | 0.01     | 0.00        | 7429 | 1        | 0.07    | -0.002 | 11102    | 9     |   |
| LR12-282            | M          | FCD 1b | N/A                 | 1                            | Brain          | 0.02                    | -0.00        | 8211  | 3        | 0.04         | -0.02 | 9741     | 3             | 0.00 | 0.00     | 6591          | 1     | 0.01     | 0.00        | 7429 | 1        | 0.07    | -0.002 | 11102    | 9     |   |
| LR12-283            | M          | FCD 1b | N/A                 | 1                            | Brain          | 0.02                    | -0.00        | 8211  | 3        | 0.04         | -0.02 | 9741     | 3             | 0.00 | 0.00     | 6591          | 1     | 0.01     | 0.00        | 7429 | 1        | 0.07    | -0.002 | 11102    | 9     |   |
| LR12-284            | M          | FCD 1b | N/A                 | 1                            | Brain          | 0.02                    | -0.00        | 8211  | 3        | 0.04         | -0.02 | 9741     | 3             | 0.00 | 0.00     | 6591          | 1     | 0.01     | 0.00        | 7429 | 1        | 0.07    | -0.002 | 11102    | 9     |   |
| LR12-285            | M          | FCD 1b | N/A                 | 1                            | Brain          | 0.02                    | -0.00        | 8211  | 3        | 0.04         | -0.02 | 9741     | 3             | 0.00 | 0.00     | 6591          | 1     | 0.01     | 0.00        | 7429 | 1        | 0.07    | -0.002 | 11102    | 9     |   |
| LR12-286            | M          | FCD 1b | N/A                 | 1                            | Brain          | 0.02                    | -0.00        | 8211  | 3        | 0.04         | -0.02 | 9741     | 3             | 0.00 | 0.00     | 6591          | 1     | 0.01     | 0.00        | 7429 | 1        | 0.07    | -0.002 | 11102    | 9     |   |
| LR12-287            | M          | FCD 1b | N/A                 | 1                            | Brain          | 0.02                    | -0.00        | 8211  | 3        | 0.04         | -0.02 | 9741     | 3             | 0.00 | 0.00     | 6591          | 1     | 0.01     | 0.00        | 7429 | 1        | 0.07    | -0.002 | 11102    | 9     |   |
| LR12-288            | M          | FCD 1b | N/A                 | 1                            | Brain          | 0.02                    | -0.00        | 8211  | 3        | 0.04         | -0.02 | 9741     | 3             | 0.00 | 0.00     | 6591          | 1     | 0.01     | 0.00        | 7429 | 1        | 0.07    | -0.002 | 11102    | 9     |   |
| LR12-289            | M          | FCD 1b | N/A                 | 1                            | Brain          | 0.02                    | -0.00        | 8211  | 3        | 0.04         | -0.02 | 9741     | 3             | 0.00 | 0.00     | 6591          | 1     | 0.01     | 0.00        | 7429 | 1        | 0.07    | -0.002 | 11102    | 9     |   |
| LR12-290            | M          | FCD 1b | N/A                 | 1                            | Brain          | 0.02                    | -0.00        | 8211  | 3        | 0.04         | -0.02 | 9741     | 3             | 0.00 | 0.00     | 6591          | 1     | 0.01     | 0.00        | 7429 | 1        | 0.07    | -0.002 | 11102    | 9     |   |
| LR12-291            | M          | FCD 1b | N/A                 | 1                            | Brain          | 0.02                    | -0.00        | 8211  | 3        | 0.04         | -0.02 | 9741     | 3             | 0.00 | 0.00     | 6591          | 1     | 0.01     | 0.00        | 7429 | 1        | 0.07    | -0.002 | 11102    | 9     |   |
| LR12-292            | M          | FCD 1b | N/A                 | 1                            | Brain          | 0.02                    | -0.00        | 8211  | 3        | 0.04         | -0.02 | 9741     | 3             | 0.00 | 0.00     | 6591          | 1     | 0.01     | 0.00        | 742  |          |         |        |          |       |   |

**Supplementary Table 5: Neuropathological classification for cohort.** The neuropathological diagnosis for the 58 patients reported here, sub-classified by their primary clinical diagnosis, and the number of cases within each category. Abbreviations: FCD, focal cortical dysplasia; HIE, hypoxic-ischemic encephalopathy; MTS, mesial temporal sclerosis; Multifocal CD, multifocal cortical dysplasia; PMG, polymicrogyria

| <b>Clinical Diagnosis</b> | <b>Neuropathology</b> | <b>Cases</b> |
|---------------------------|-----------------------|--------------|
| <b>FCD/HMEG/DMEG</b>      | FCD                   | 5            |
|                           | FCD 1                 | 3            |
|                           | FCD 1a                | 3            |
|                           | FCD 1b                | 3            |
|                           | FCD 1c                | 1            |
|                           | FCD 2                 | 1            |
|                           | FCD 2a                | 19           |
|                           | FCD 2b                | 4            |
|                           | FCD 3d                | 1            |
| <b>MCD</b>                | PMG                   | 2            |
|                           | Multifocal CD/ FCD 1c | 1            |
|                           | Multifocal CD/ FCD 2b | 2            |
| <b>Other</b>              | Gliosis               | 3            |
|                           | MTS                   | 1            |
|                           | Meningoangiomas       | 1            |
|                           | Stroke                | 1            |
|                           | HIE                   | 1            |
|                           | N/A                   | 6            |
| <b>TOTAL</b>              |                       | <b>58</b>    |



**Supplementary Table 6: Genotype-neuropathology correlation for patient LR13-129; LR16-313 and LR18-024.** Results from ddPCR analysis and neuropathology evaluation for these three representative patients are listed below. For neuropathologic evaluation, hematoxylin and eosin staining (H&E) was performed and cortical layering, as well as presence/absence of balloon/abnormal neurons was evaluated. The H&E results refer to the percentage of abnormal area as evaluated by the pathologist. When possible, pS6 staining was performed and presence of positive neurons (dark or light staining, percentage relative to the area of the section) was performed. For ddPCR results, cells shaded in gray represent brain regions that are positive for the relative hotspot mutation, while cells shaded in gray represent brain regions that do not present the mutation. For LR18-204, FFPE and fresh frozen samples are listed. Two representative brain regions (inferior temporal, positive; and superior temporal, negative) from patient LR18-024 were selected for a comparison of VAF% detected via ddPCR in fresh frozen vs FFPE samples. See Figure 5 for a schematic representation of the two LR18-024 specimens and relative neuropathology findings, and Supplementary Fig. 3 for neuropathology analysis for samples relative to LR13-129 and LR16-313. Blocks highlighted in Fig.5 and Supplementary Fig. 3 are highlighted here in yellow (positive blocks) and gray (negative blocks).

| Sample description | ddPCR                                        |       |             |                 |            |                |                                                 |                                                 |     |                                 | Neuropathology |      |  |  |  |  |  |  |  |  |
|--------------------|----------------------------------------------|-------|-------------|-----------------|------------|----------------|-------------------------------------------------|-------------------------------------------------|-----|---------------------------------|----------------|------|--|--|--|--|--|--|--|--|
|                    | VAF%                                         | DCI   | WT droplets | Mutant droplets | H&E        |                | Not able to evaluate                            | Dark                                            |     | Light                           |                | None |  |  |  |  |  |  |  |  |
|                    |                                              |       |             |                 | Dysplastic | Non-Dysplastic |                                                 | Comment                                         | %   | Comment                         | %              |      |  |  |  |  |  |  |  |  |
| LR13-129           | Left                                         | 0.02  | -0.05       | 10946           | 2          | 50             | 0                                               | Dysplastic area                                 | 15% | Dysplastic area                 | 80%            |      |  |  |  |  |  |  |  |  |
|                    | Medial Frontal                               | 0.04  | -0.04       | 12079           | 6          | 0              | 100                                             | Dysplastic area                                 | 15% | Dysplastic area                 | 80%            |      |  |  |  |  |  |  |  |  |
|                    | Inferior Frontal                             | 0.57  | 0.39        | 11908           | 75         | 100            | 0                                               |                                                 | 80% |                                 | 0%             |      |  |  |  |  |  |  |  |  |
|                    | Frontal                                      | 0.06  | -0.03       | 12784           | 8          | 5%             | 80%                                             |                                                 | 20% |                                 | 0%             |      |  |  |  |  |  |  |  |  |
|                    | Parietal                                     | 0.05  | -0.05       | 10155           | 5          | 20%            | 75%                                             | Mostly dysplastic area                          | 20% |                                 | 55%            |      |  |  |  |  |  |  |  |  |
|                    | Posterior temporal                           | 0.24  | 0.01        | 11220           | 30         | 0%             | 100%                                            | Diffusely distributed mostly in layer V         | 80% |                                 | 10%            |      |  |  |  |  |  |  |  |  |
|                    | Occipital                                    | 0.03  | -0.05       | 11116           | 4          | 20%            | 60%                                             |                                                 | 20% |                                 | 55%            |      |  |  |  |  |  |  |  |  |
|                    | White matter                                 | 0.06  | -0.04       | 8708            | 6          | 30%            | 30%                                             | Concentrated in dysplastic area                 | 20% | Concentrated in dysplastic area | 60%            |      |  |  |  |  |  |  |  |  |
|                    | Superior Frontal                             | 0.08  | -0.02       | 10519           | 9          | 20%            | 50%                                             |                                                 | 15% |                                 | 70%            |      |  |  |  |  |  |  |  |  |
|                    | Temporal lobe (A)                            | 1.66  | 1.23        | 3206            | 57         | 20             | 60                                              | Most prevalent in dysplastic foci and layer III | 75% | Layers III and V                | 10%            |      |  |  |  |  |  |  |  |  |
|                    | Temporal Lobe (B)                            | 1.26  | 0.64        | 1238            | 16         | 25             | 10                                              | Most prevalent in dysplastic foci and layer III | 40% | Layers III and V                | 5%             |      |  |  |  |  |  |  |  |  |
|                    | Hippocampus                                  | 7.26  | 6.38        | 3017            | 245        | 70             | 20                                              | Most prevalent in dysplastic foci               | 50% | Layers III and V                | 5%             |      |  |  |  |  |  |  |  |  |
|                    | Insula (D1)                                  | 5.93  | 5.39        | 6603            | 453        | 50             | 40                                              | Most prevalent in dysplastic foci and layer III | 45% |                                 | 5%             |      |  |  |  |  |  |  |  |  |
|                    | Insula (D2)                                  | 6.44  | 5.32        | 3538            | 80         | 50             | 10                                              | Most prevalent in dysplastic foci and layer III | 75% |                                 | 5%             |      |  |  |  |  |  |  |  |  |
|                    | Insula (D3)                                  | 7.08  | 6.03        | 1914            | 134        | 50             | 40                                              | Most prevalent in dysplastic foci and layer III | 75% |                                 | 5%             |      |  |  |  |  |  |  |  |  |
| Insula (D4)        | 8.25                                         | 6.99  | 2432        | 189             | 75         | 15             | Most prevalent in dysplastic foci and layer III | 75%                                             |     | 5%                              |                |      |  |  |  |  |  |  |  |  |
| Insula (D5)        | 2.44                                         | 1.61  | 1849        | 169             | 10         | 90             | Mostly scattered in layer V                     | 10%                                             |     | 65%                             |                |      |  |  |  |  |  |  |  |  |
| temporal lip       | 2.13                                         | 1.67  | 1537        | 39              | 10         | 90             |                                                 | 0%                                              | N/A |                                 |                |      |  |  |  |  |  |  |  |  |
| FFPE               | Inferior temporal, FFPE, IT1                 | 0.070 | 0.000       | 5478            | 4          | 10%            | 30%                                             |                                                 | 0%  |                                 | 100%           |      |  |  |  |  |  |  |  |  |
|                    | Inferior temporal, FFPE, IT2                 | 0.140 | 0.046       | 6081            | 9          | 0%             | 50%                                             |                                                 | 3%  |                                 | 95%            |      |  |  |  |  |  |  |  |  |
|                    | Inferior temporal, FFPE, IT3                 | 0.030 | 0.000       | 8065            | 3          | 0%             | 60%                                             |                                                 | 0%  |                                 | 95%            |      |  |  |  |  |  |  |  |  |
|                    | Superior temporal, FFPE, ST1, dysplastic     | 0.020 | -0.260      | 5811            | 1          |                |                                                 |                                                 |     |                                 |                |      |  |  |  |  |  |  |  |  |
|                    | Superior temporal, FFPE, ST1, non-dysplastic | 0.050 | -0.260      | 7012            | 4          | 15             | 65                                              | perfect correlation with dysplasia              | 85  |                                 | 0              |      |  |  |  |  |  |  |  |  |
|                    | Superior temporal, FFPE, ST1, full scroll    | 0.030 | -0.260      | 9617            | 3          |                |                                                 |                                                 |     |                                 |                |      |  |  |  |  |  |  |  |  |
|                    | Anterior Dysplasia                           | 0.03  | -0.072      | 9793            | 3          | 50%            | 50%                                             |                                                 |     |                                 |                |      |  |  |  |  |  |  |  |  |
|                    | Superior Temporal                            | 0.06  | -0.050      | 14216           | 10         | 10%            | 30%                                             |                                                 |     |                                 |                |      |  |  |  |  |  |  |  |  |
|                    | Temporal Lip                                 | 0.13  | 0.000       | 11545           | 17         | 0              | 70                                              |                                                 |     |                                 |                |      |  |  |  |  |  |  |  |  |
|                    | Inferior Temporal                            | 0.28  | 0.170       | 14078           | 44         | 0%             | 75%                                             |                                                 |     |                                 |                |      |  |  |  |  |  |  |  |  |
| Fresh Frozen       | Anterior Inferior                            | 0.15  | 0.010       | 13641           | 21         | 10%            | 60%                                             |                                                 |     |                                 |                |      |  |  |  |  |  |  |  |  |
|                    | Middle Temporal                              | 0.10  | -0.040      | 9024            | 10         | 0              | 20                                              |                                                 |     |                                 |                |      |  |  |  |  |  |  |  |  |
|                    | Antygalla                                    | 0.12  | 0.000       | 15447           | 21         | 0              | 20                                              |                                                 |     |                                 |                |      |  |  |  |  |  |  |  |  |
|                    | Hippocampus                                  | 0.11  | -0.050      | 6252            | 7          | 0              | 90                                              |                                                 |     |                                 |                |      |  |  |  |  |  |  |  |  |
|                    | Cyst Specimen                                | 0.03  | -0.072      | 4266            | 2          |                |                                                 | too poorly oriented to evaluate for dysplasia   |     |                                 |                |      |  |  |  |  |  |  |  |  |

## SUPPLEMENTARY FIGURES

**Supplementary Figure 1. ddPCR representative results. (A)** Examples of 2D Quantasoft plots for brain tissues from patient LR13-389, carrying the *MTOR* p.S2215F mutation. Variant allele fractions (VAF%) and Delta confidence intervals (DCI) are shown for each sample. The temporal lobe (sample 1312119) shows a clear positive result, with mutant droplets (in the blue oval) clustering in the upper left quadrant and in higher number than the double positive droplets (in the orange oval), with wild-type droplets in green clustering in the lower right quadrant. A frontal lobe sample from the second surgical procedure (sample 1405078) was negative, with 4 mutant droplets (in the blue oval) detected which were also present in the wild-type control in the same run, as demonstrated by the negative DCI. A sample from the frontal operculum region (1312121) had a “borderline” result. Samples with VAF 0.16% and DCI=0.032 would be considered positive by the Biorad analysis protocol. However, as the plot shows, the number of mutant droplets (in the blue oval, n=7) are fewer than the double positive droplets (in the orange oval, n=9). The high number of double positive droplets leads to a false positive result, thus samples with DCI<0.045 are considered negative in this study. **(B)** The solve rate per type of tissue based on number of positive specimens vs. total. Hotspot mutations were not detectable in blood and buccal swabs.

**A**

**LR13-389 *MTOR* (p.S2215F)**

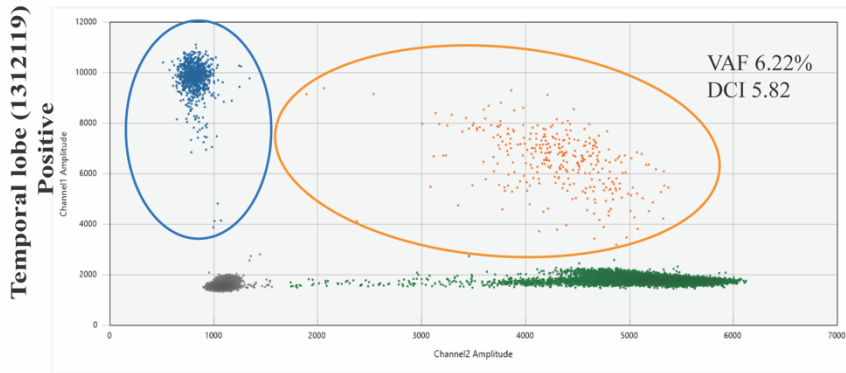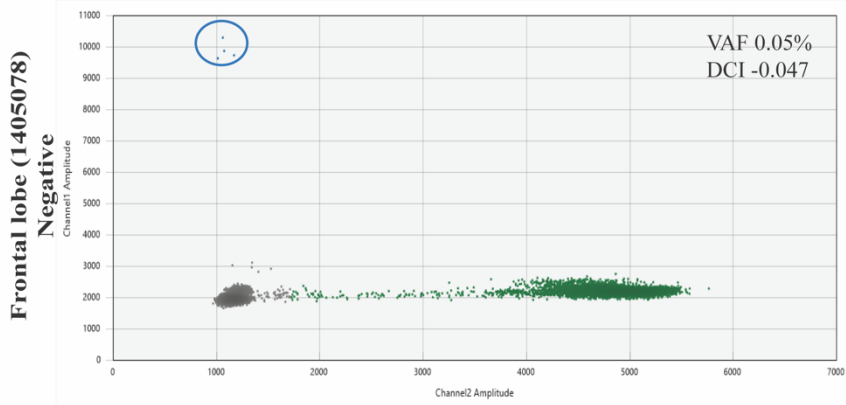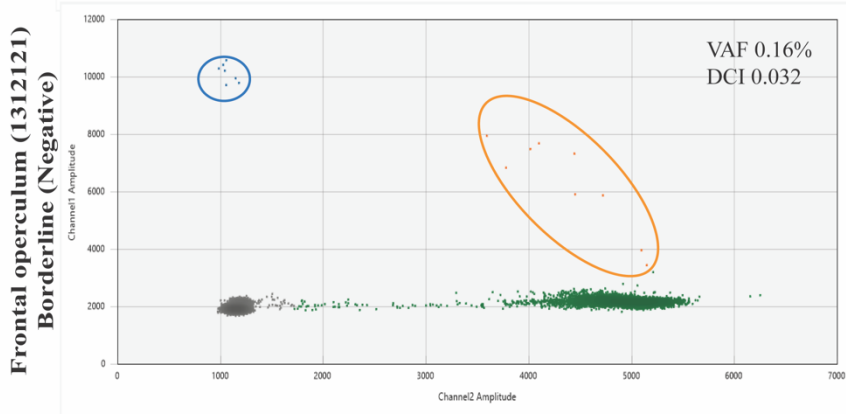

**B**

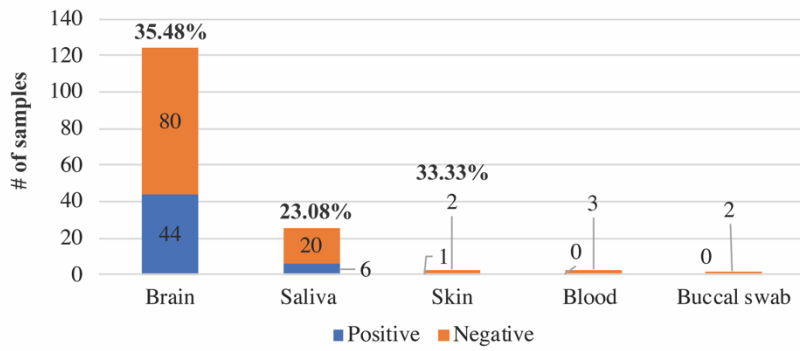

**Supplementary Figure 2: Brain MRI of four patients with FCD/HMEG/DMEG who tested negative for the 6 PI3K-AKT-MTOR hotspot mutations.** Summary MRI images showing biopsy locations. For each image, cross-hairs reflect the sample site, with letters reflecting the multiple samples taken. Green dots represent the exact location of resection. The year in which the surgery was performed is indicated after the underscore, as patient LR15-119 underwent multiple brain surgeries. These samples were tested via ddPCR for the 6 hotspot mutations and were all negative.

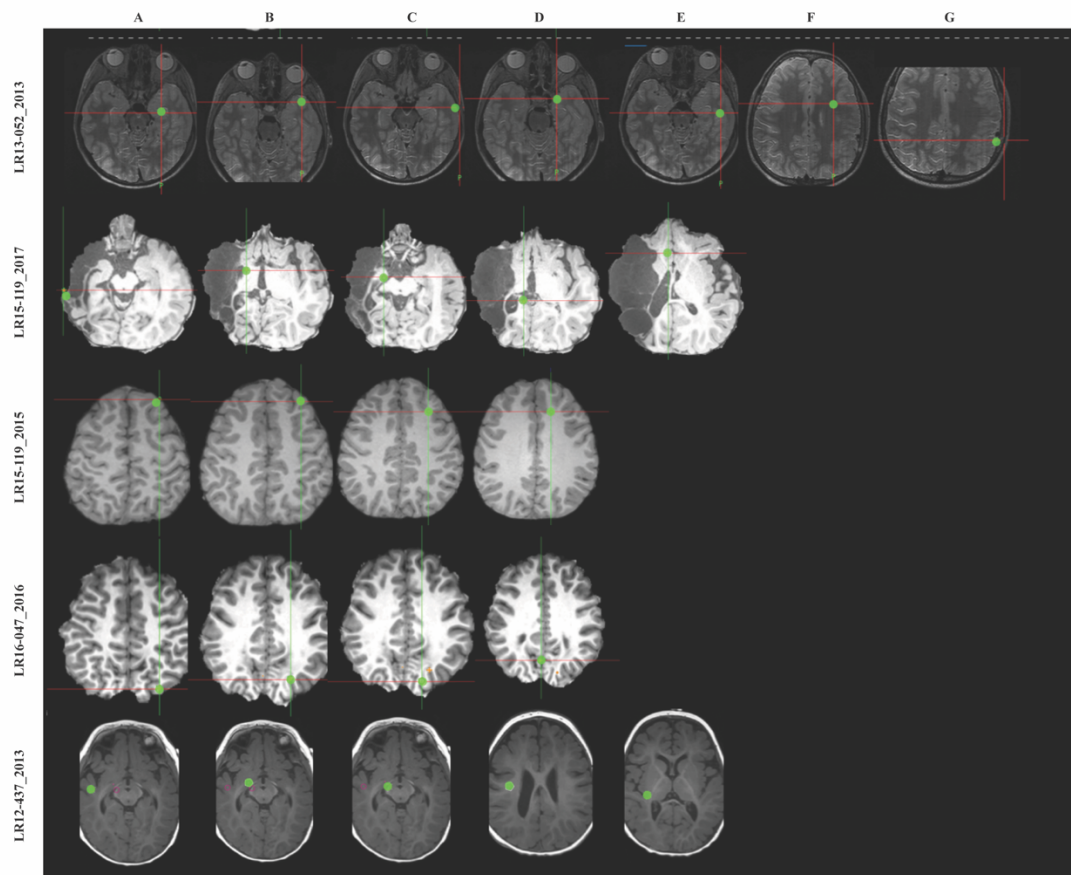

**Supplementary Figure 3: Histopathological findings and correlations with genotype in tissue samples from individuals LR13-129 and LR16-313.** (A') Schematic representation of the resection locations for patient LR13-129. Immunohistochemical and ddPCR findings in the histologically non-dysplastic parietal (B',D',F',G') and dysplastic (FCD type IIB) inferior frontal (C', E', H', I') resection specimens from patient LR13-129. (B') NeuN labeling of neurons in a low magnification field from the parietal resection specimen shows intact six-layered cortical gray matter as indicated by Roman numerals. The neurons appear cytologically normal (F'), but a significant subset show strong perikaryal pS6 immunoreactivity (D',G'). (C') In contrast, NeuN immunostaining shows marked disorganization of the cortical lamina in the inferior temporal region with balloon cells (H') and diffuse positive pS6 immunoreactivity in nearly the entire neuronal population (I'). Scale bars: B'-E', 200  $\mu$ m; F'-I', 100  $\mu$ m. (A'') Schematic representation of the resection location for patient LR16-313. Immunohistochemical and ddPCR findings in the histologically non-dysplastic (B'', D'', F'', G'') and dysplastic area (C'', E'', H'', I'') from the temporal lobe resection (block B) LR16-313. (B'') NeuN labeling of neurons in a low magnification field from a portion of the temporal lobe resection specimen shows intact six-layered cortical gray matter as indicated by Roman numerals. The neurons appear cytologically normal (F''), despite having a detectable mosaic burden in this region (VAF 1.26%). In contrast, NeuN immunostaining shows disorganization of the cortical lamina in a portion of the same region (C'') with atypical large neurons (H'') and intense positive pS6 immunoreactivity in a subset of the neuronal population (I''). Scale bars: B-E, 200  $\mu$ m; F-I, 100  $\mu$ m. Overview of ddPCR results for all samples belonging to these three individuals with matching neuropathology evaluation is presented in Supplementary Table 6, with the negative blocks (red text) and positive blocks (green text) matching the ones represented in this figure.

**A'** **LR13-129**  
*MTOR* p.S2215F VAF% 0-0.57%

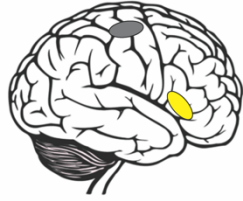

Parietal (Non-dysplastic, VAF 0.05%)      Inferior Frontal (Dysplastic, VAF 0.57%)

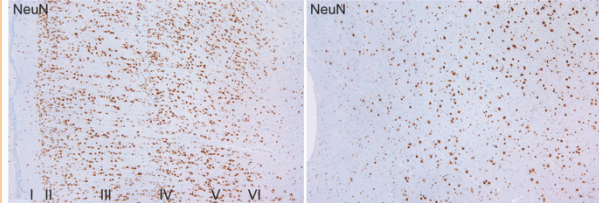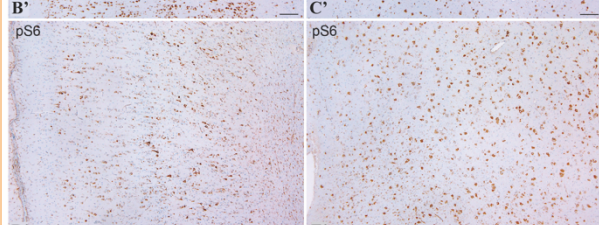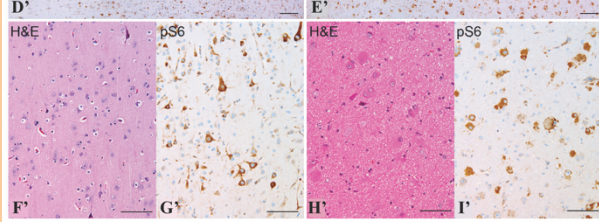

**A''** **LR16-313**  
*AKT3* p.E17K VAF% 1.26-8.25%

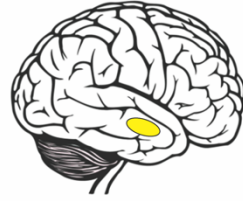

Temporal B (Non-dysplastic, VAF 1.26%)      Temporal B (Dysplastic, VAF 1.26%)

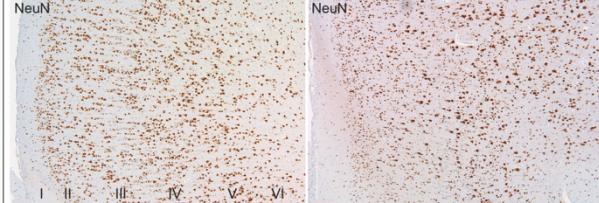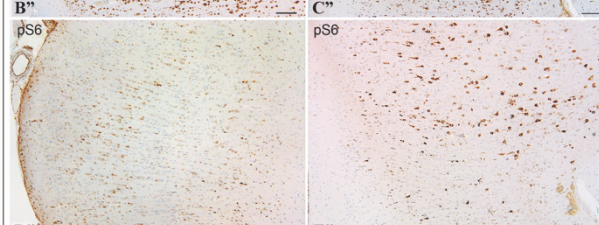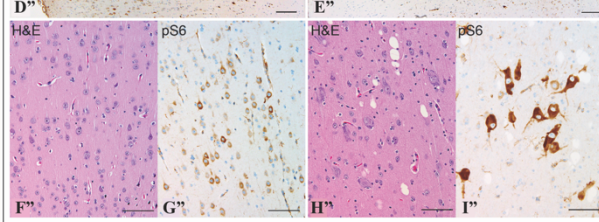

Supplement: awab376_supplementary_data.pdf [file awab376_supplementary_data.pdf]
